# Supplementary material for: Multilevel strategies for the composition and formation of DAAF/HNIW composite crystals
Source: Royal Society of Chemistry journal article supplement (doi:10.1039/d1ce01277k), 2021-01-01
Supplement: d1ce01277k1.pdf [file d1ce01277k1.pdf]

## Supporting documents

### 1 Effects of Different Surfactants on the Morphology of Microspheres DAAF/HNIW

Effects of different surfactants on the morphology of microspheres DAAF/HNIW crystal were studied with the quantity of surfactant. The morphology of the DAAF/HNIW crystal was obtained by the microfluidics technology. Figure 5 shows DAAF/HNIW composite using different surfactants. DAAF/HNIW crystal with SDS has uneven particle size distribution and rough surface. Most of the products DAAF/HNIW crystals were irregular shape with more rectangular structure when PVP was added. However, DAAF/HNIW crystal assembled into microspheres during process when SDBS was added.

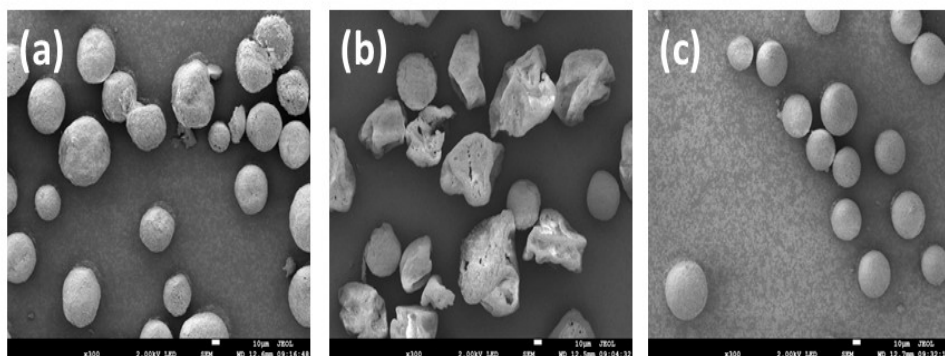

Figure 1. SEM of microspheres DAAF/HNIW crystal structures using different surfactants: (a) Sodium dodecyl sulfate, (b) Polyvinylpyrrolidone, (c) Sodium dodecylbenzenesulphonate

### 2 Effects of Different Temperatures on the Morphology of Microspheres DAAF/HNIW

Microspheres DAAF/HNIW crystals show higher degree of sphericity. However, processing of DAAF/HNIW crystals in laboratory by microfluidics technology shows some characteristics at different temperatures. Experiments were carried out by varying the temperature such as 40, 50 and 60 °C. They were spherical in shape and ranged

from 60  $\mu\text{m}$  to 70  $\mu\text{m}$ . The difference was observed between the morphology of the microspheres DAAF/HNIW by different temperatures. The surface of the microspheres was smoother at 50  $^{\circ}\text{C}$ , while the surface of the particles is rough and has cracks at 40 and 60  $^{\circ}\text{C}$  as shown in Figure 6 (a) and Figure 6 (c).

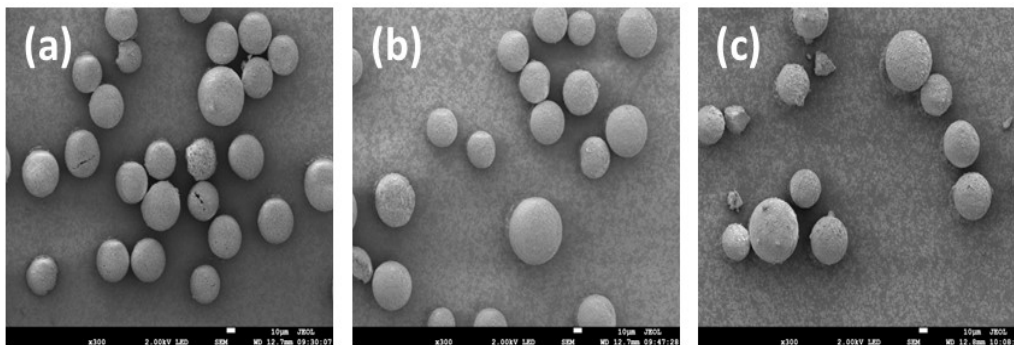

Figure 2. SEM of microspheres DAAF/HNIW crystals using different temperatures:  
(a) 60  $^{\circ}\text{C}$ , (b) 50  $^{\circ}\text{C}$ , (c) 40  $^{\circ}\text{C}$ .
